# Supplementary material for: Translating E-Mental Health Into Practice: What Are the Barriers and Enablers to E-Mental Health Implementation by Aboriginal and Torres Strait Islander Health Professionals?
Source: PubMed Central journal article supplement (PMC5266824; doi:10.2196/jmir.6269), 2017-01-11
Supplement: jmir_v19i1e1_app3.pdf [file jmir_v19i1e1_app3.pdf]

- Examples of Youtube clips:
  - Nuggets <https://www.youtube.com/watch?v=HUnGLgGRJpo>
  - Meth Inside Out: Brain and Behaviour. Various youtubes including: <https://www.youtube.com/watch?v=dsFpe4IiF8w>
  - Kids matter <https://www.youtube.com/watch?v=WxH3aTVVp-o>
- Stayin on track: <https://www.stayinontrack.com/>
- Alcohol and safety: <https://itunes.apple.com/au/app/alcohol-and-safety/id1017564062?mt=8>
- So You Think You Can Quit app: <http://nosmokes.com.au/fun/apps/>
- Rays night out: <https://itunes.apple.com/au/app/rays-night-out/id978589497?mt=8>
- 3D Brain app: <https://itunes.apple.com/au/app/3d-brain/id331399332?mt=8>
- Worrytime: <http://au.reachout.com/reachout-worrytime-app>
- Breathe: <http://au.reachout.com/reachout-worrytime-app>
- My Script Smart Note: <https://itunes.apple.com/us/app/myscript-smart-note-handwriting/id477967083?mt=8>
